# Supplementary material for: Novel hexameric tin carboxylate clusters as efficient negative-tone EUV photoresists: high resolution with well-defined patterns under low energy doses
Source: Royal Society of Chemistry journal article supplement (doi:10.1039/d3na00131h), 2023-01-01

## ***Supporting Information***

### **Novel Hexameric Tin Carboxylate Clusters as Efficient Negative-Tone EUV Photoresists: High resolution with Well-Defined Patterns using Low Energy Doses**

*Ting-An Lin<sup>a</sup>, Yan-Ru Wu<sup>a</sup>, Po-Hsiung Cheng,<sup>b</sup> Tsi-Sheng Gau\*<sup>b,c</sup> Burn-Jeng Lin\*<sup>b,c</sup>*

*Po-Wen Chiu\*<sup>b,c</sup> and Rai-Shung Liu<sup>a\*</sup>*

<sup>a</sup>Frontier Research Center for Matter Science and Technology, Department of Chemistry, <sup>b</sup>TSMC-NTHU Joint Research Center, <sup>c</sup>Department of Electric Engineering, National Tsing-Hua University, Hsinchu, Taiwan, ROC-----  
-----email:rsliu@mx.nthu.edu.tw

#### **Content:**

|                                                                  |     |
|------------------------------------------------------------------|-----|
| 1. SEM images E-beam lithography patterns -----                  | S1  |
| 2. SEM images EUV lithography patterns -----                     | S2  |
| 3. Table s1: LWR values for cluster 1-----                       | S7  |
| 4. X-ray crystallographic structures and data -----              | S7  |
| 5. Spectral data of key compounds -----                          | S13 |
| 6. <sup>1</sup> H and <sup>13</sup> C NMR of key compounds ----- | S14 |

# 1. SEM image of E-beam lithography patterns

| Design HP \ Dose                                                         | Design HP = 50 nm                                                                                      | Design HP = 40 nm                                                                                      | Design HP = 30 nm                                                                                       | Design HP = 20 nm                                                                   |
|--------------------------------------------------------------------------|--------------------------------------------------------------------------------------------------------|--------------------------------------------------------------------------------------------------------|---------------------------------------------------------------------------------------------------------|-------------------------------------------------------------------------------------|
| <b>1120 <math>\mu\text{C}/\text{cm}^2</math></b><br>(Design L/S = 1:1.5) | <b>HP = 64 nm</b><br>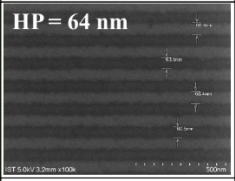 | <b>HP = 49 nm</b><br> | <b>HP = 40 nm</b><br> |  |
| <b>1440 <math>\mu\text{C}/\text{cm}^2</math></b><br>(Design L/S = 1:1)   | <b>HP = 52 nm</b><br> | <b>HP = 39 nm</b><br> | <b>HP = 31 nm</b><br> |  |

**Figure S1.** SEM images of E-beam lithography patterns for cluster 1; Process parameter: 1.5 wt%, THK = 20.9 nm, Developer: 2-Heptanone 60 s, PEB= 80°C 60 s

| Design HP \ Dose                                                                 | Design HP = 50 nm                                                                                       | Design HP = 40 nm                                                                                        | Design HP = 30 nm                                                                                         |
|----------------------------------------------------------------------------------|---------------------------------------------------------------------------------------------------------|----------------------------------------------------------------------------------------------------------|-----------------------------------------------------------------------------------------------------------|
| <b>Dose E= 800 <math>\mu\text{C}/\text{cm}^2</math></b><br>(Design L/S = 1:1.25) | <b>HP= 55 nm</b><br>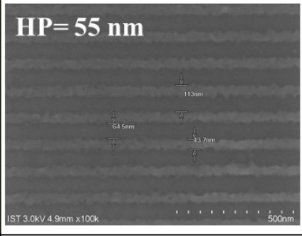  | <b>HP= 44 nm</b><br>  | <b>HP= 37 nm</b><br>  |
| <b>Dose E= 1120 <math>\mu\text{C}/\text{cm}^2</math></b>                         | <b>HP= 57 nm</b><br> | <b>HP= 44 nm</b><br> | <b>HP= 35 nm</b><br> |
| <b>Dose E= 1440 <math>\mu\text{C}/\text{cm}^2</math></b>                         | <b>HP= 57 nm</b><br> | <b>HP= 47 nm</b><br> | <b>HP= 36 nm</b><br> |

**Figure S2.** SEM images of E-beam lithography patterns for cluster 2; Process parameter: 1.75 wt%, THK = 22.9 nm, Developer: 2-Heptanone 60 s, PEB = 80°C 60 s



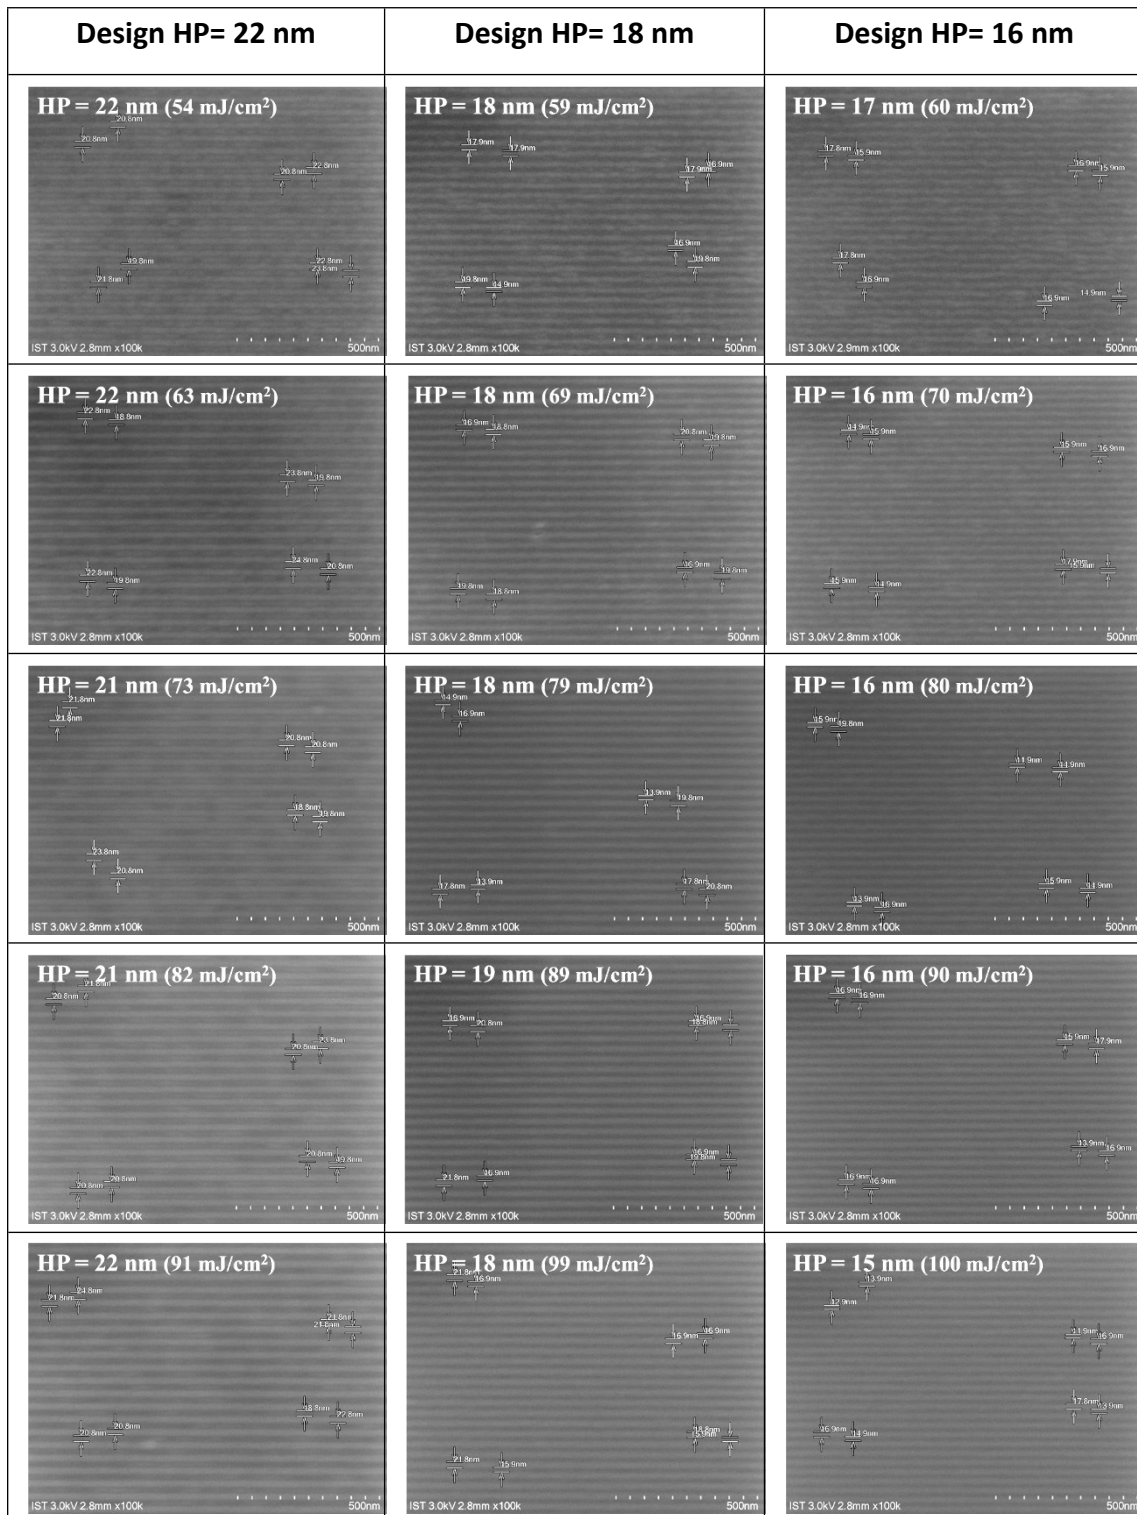

**Figure S4.** SEM images of EUV lithography patterns for cluster 1: HP=22, 18, 16 nm at different dose. Process parameter: 1.5 wt%, THK = 20.9 nm, Developer: 2-Heptanone 60 s, PEB= 80°C 60 s

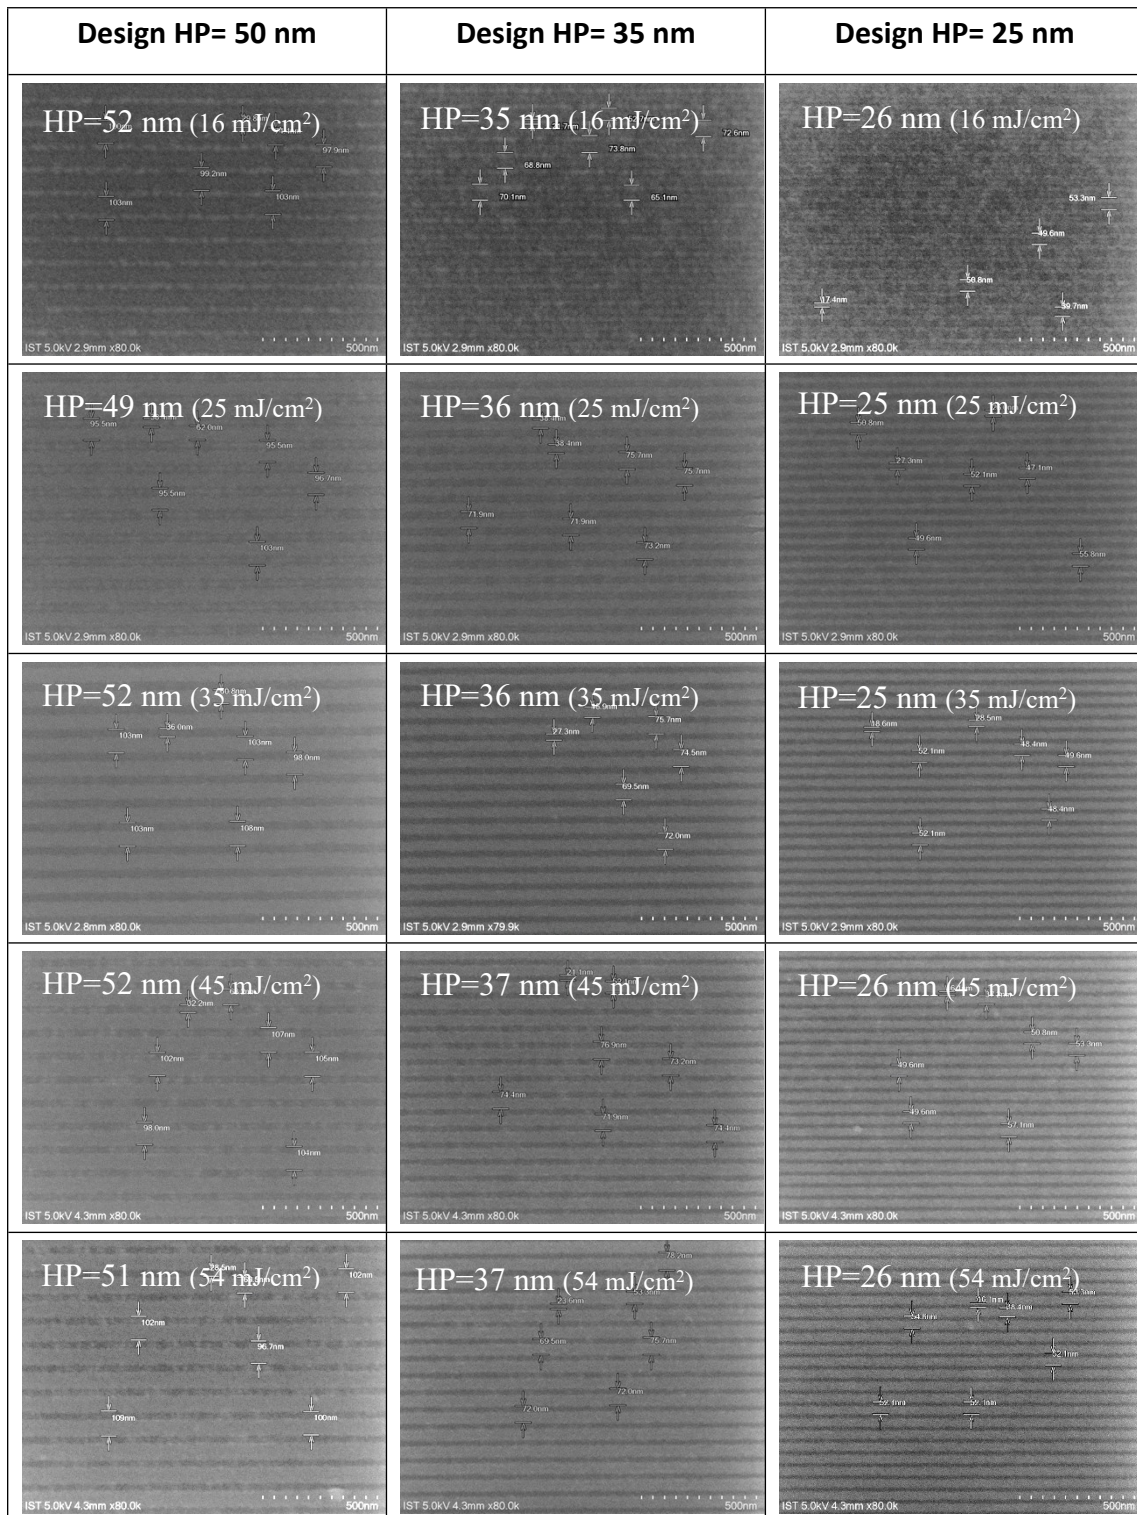

**Figure S5.** SEM images of EUV lithography patterns for cluster 2: HP=50, 35, 25 nm at different dose. Process parameter: 1.75 wt%, PAB = 60°C 60s, THK = 22.9 nm, Developer: 2-Heptanone 60 s, No PEB.

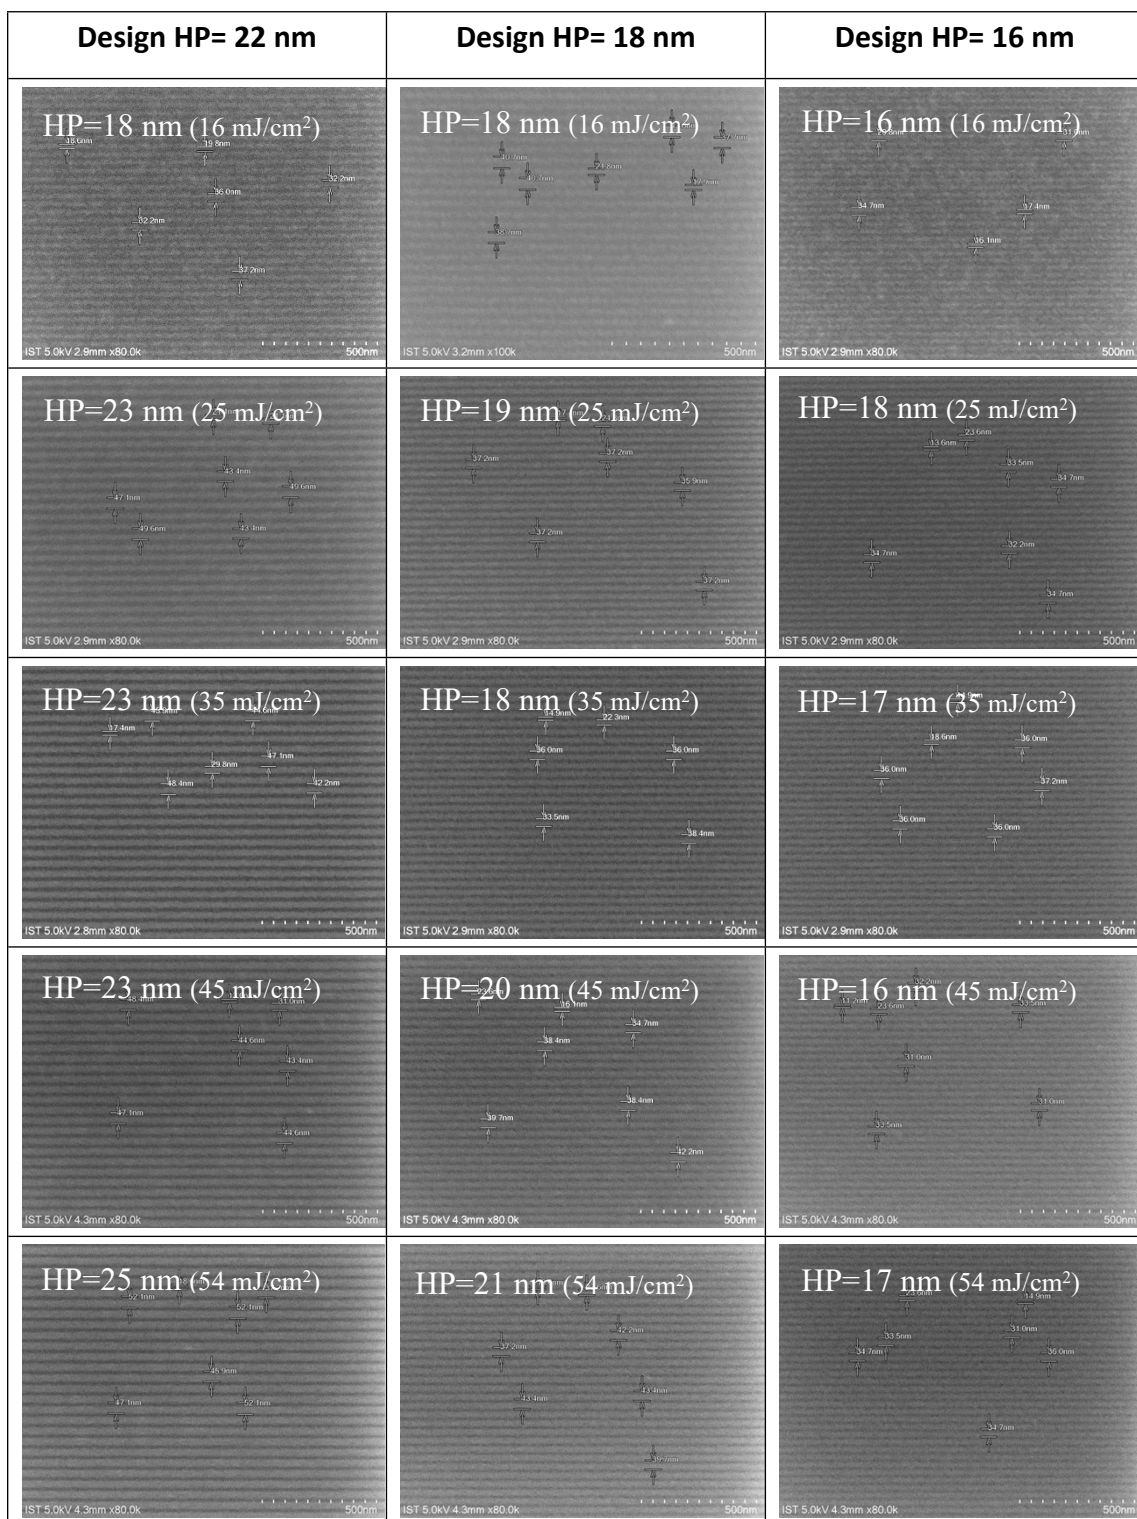

**Figure S6.** SEM images of EUV lithography patterns for cluster 2. HP=22, 18, 16 nm at different dose. Process parameter: 1.75 wt%, PAB = 60°C 60s, THK = 22.9 nm, Developer: 2-Heptanone 60 s, No PEB.

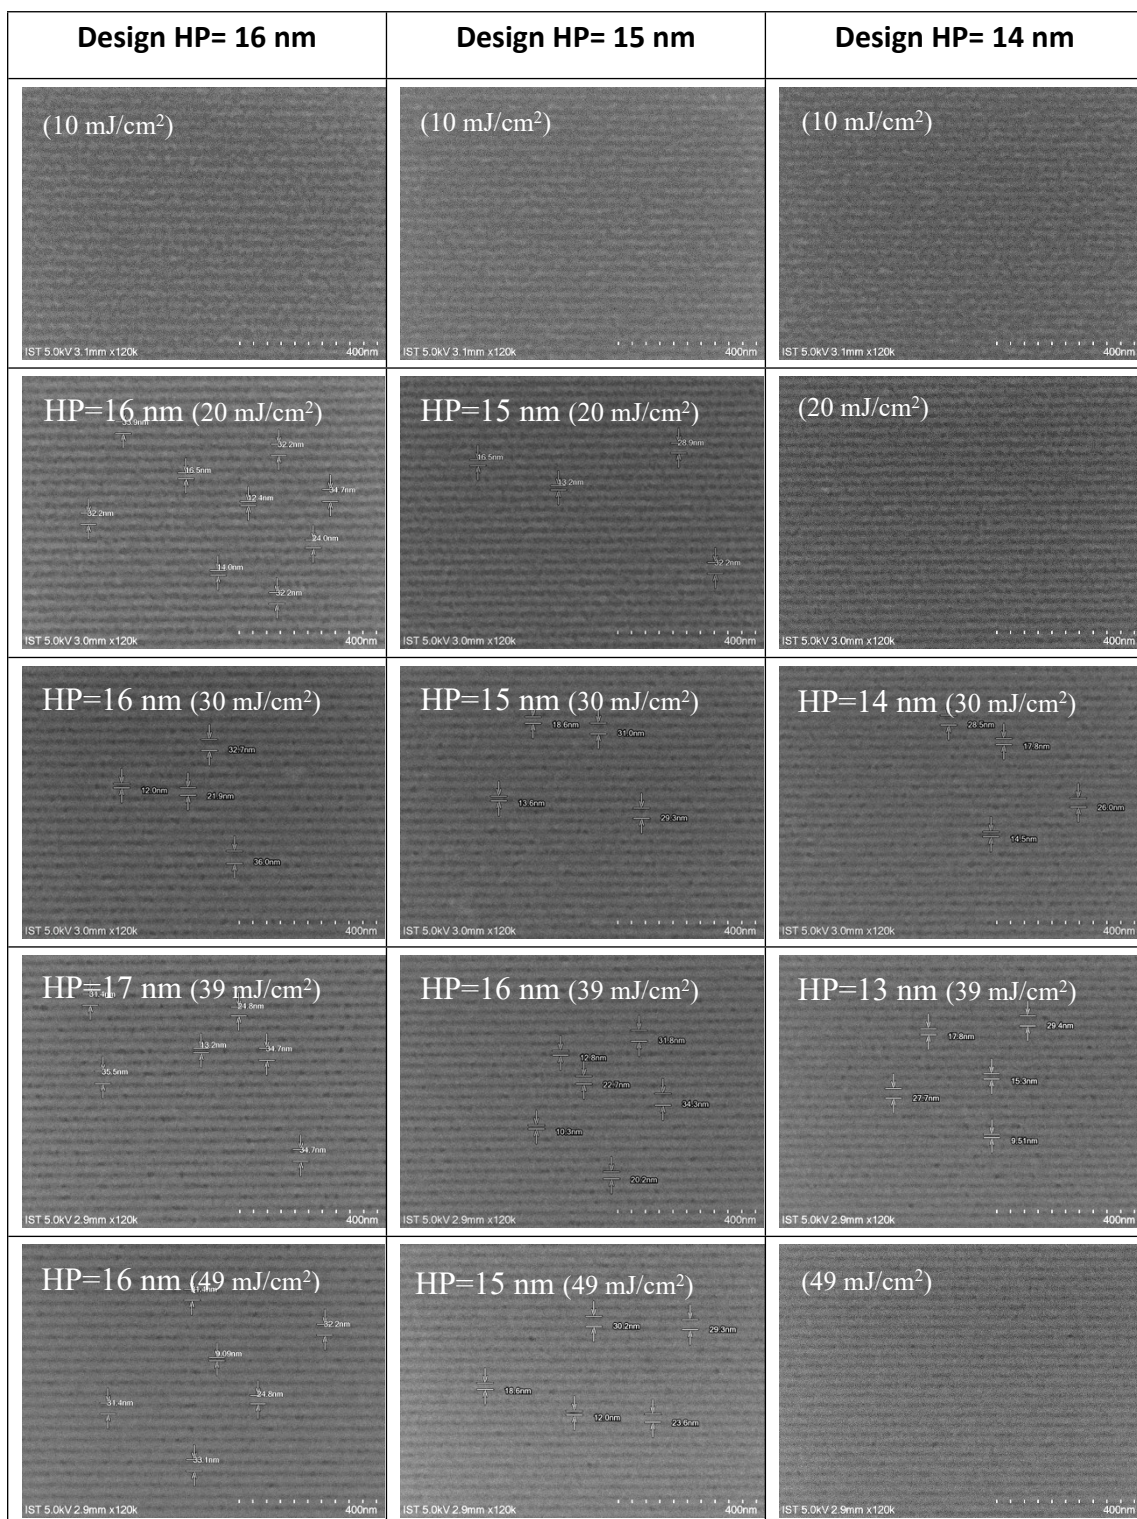

**Figure S7.** SEM images of EUV lithography patterns for cluster 2, HP=16, 15, 14 nm at different dose. Process parameter: 1.75 wt%, PAB = 60°C 40s, THK = 20.62 nm, Developer: 2-Heptanone 60 s, No PEB.

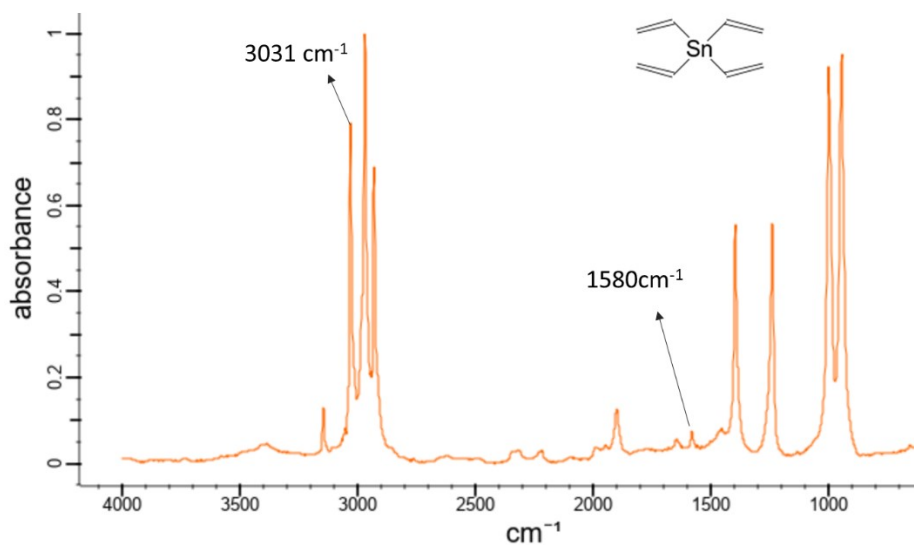

Figure S8. IR spectra of  $\text{Sn}(\text{vinyl})_4$

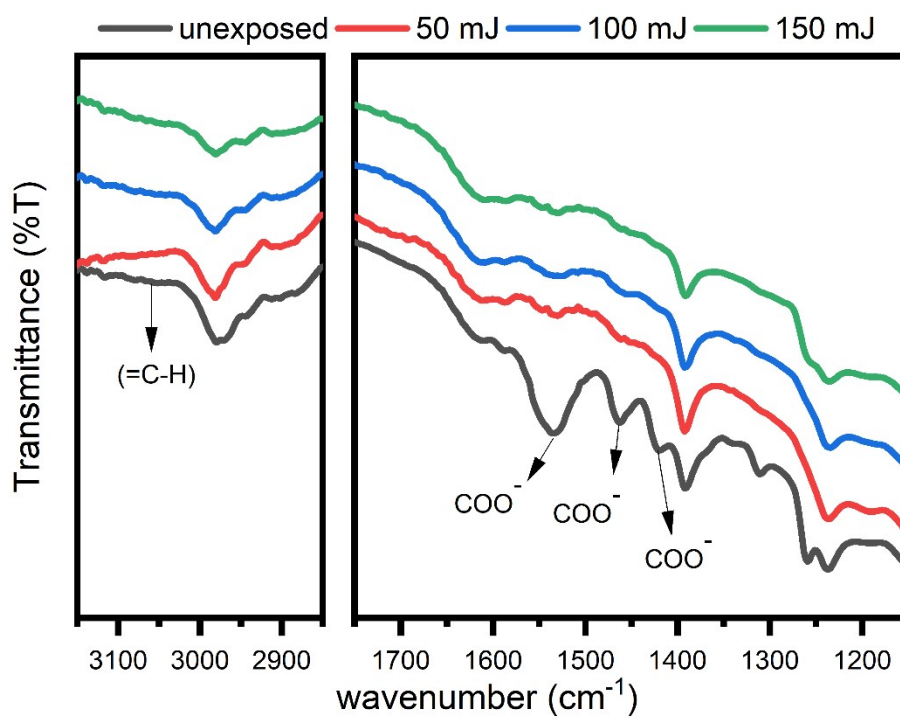

Figure S9. Spectra of photoresist 2 in which the two regions are plotted on equal Magnitudes.



### 3. Table S1. LWR values for cluster 1 :

| Cluster 1 HP = 18 nm       |          |
|----------------------------|----------|
| Dose (mJ/cm <sup>2</sup> ) | LWR (nm) |
| 79                         | 4.6      |
| 89                         | 4.9      |
| 99                         | 5.2      |

The computation is based on a software: see: I. Mochi, M. Vockenhuber, T. Allenet, Y. Ekinici, *Proc. SPIE*, 2021, **11855**, 1185502

### 4. X-ray crystallographic structures and data

#### 4.1 Crystal data and X-ray structure of cluster 1 :

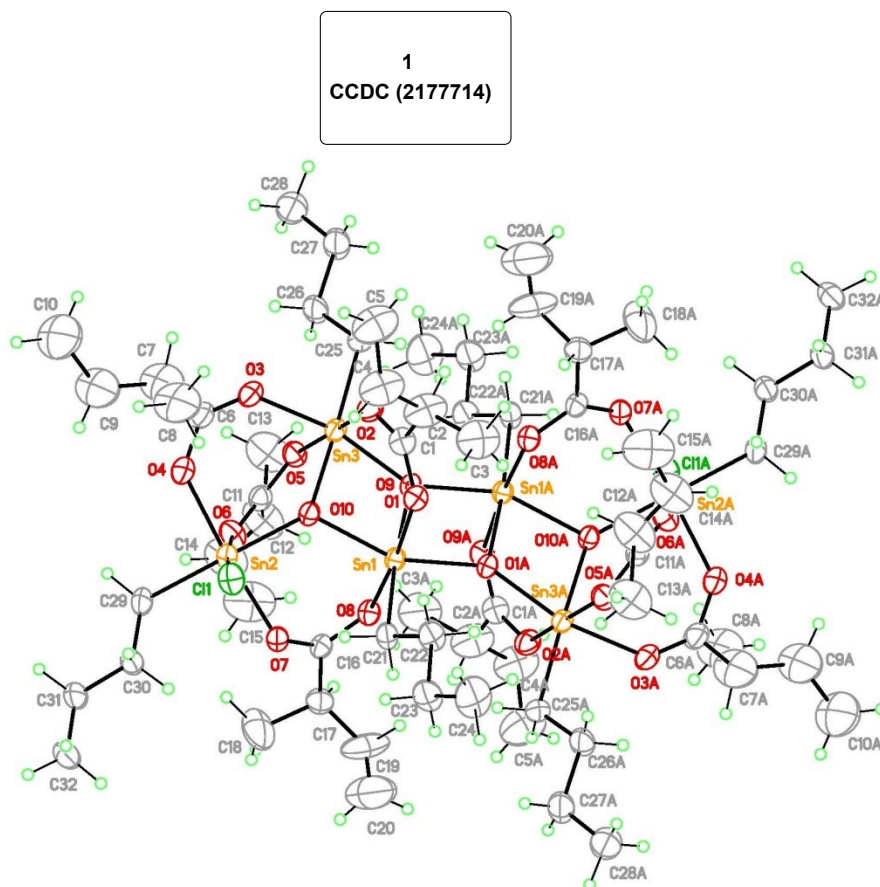

Table 1 Crystal data and structure refinement for 220347lt\_auto.

|                     |                                                                   |
|---------------------|-------------------------------------------------------------------|
| Identification code | 220347lt_auto                                                     |
| Empirical formula   | C <sub>32</sub> H <sub>55</sub> ClO <sub>10</sub> Sn <sub>3</sub> |
| Formula weight      | 991.28                                                            |
| Temperature/K       | 99.99(10)                                                         |
| Crystal system      | triclinic                                                         |

|                                             |                                                                |
|---------------------------------------------|----------------------------------------------------------------|
| Space group                                 | P-1                                                            |
| a/Å                                         | 12.4749(4)                                                     |
| b/Å                                         | 12.5391(3)                                                     |
| c/Å                                         | 15.0700(4)                                                     |
| $\alpha$ /°                                 | 90.977(2)                                                      |
| $\beta$ /°                                  | 104.825(3)                                                     |
| $\gamma$ /°                                 | 117.675(3)                                                     |
| Volume/Å <sup>3</sup>                       | 1992.54(11)                                                    |
| Z                                           | 2                                                              |
| $\rho_{\text{calc}}$ /g/cm <sup>3</sup>     | 1.652                                                          |
| $\mu$ /mm <sup>-1</sup>                     | 15.858                                                         |
| F(000)                                      | 988.0                                                          |
| Crystal size/mm <sup>3</sup>                | 0.21 × 0.14 × 0.06                                             |
| Radiation                                   | Cu K $\alpha$ ( $\lambda$ = 1.54184)                           |
| 2 $\Theta$ range for data collection/°      | 6.144 to 145.92                                                |
| Index ranges                                | -15 ≤ h ≤ 14, -13 ≤ k ≤ 15, -18 ≤ l ≤ 18                       |
| Reflections collected                       | 26569                                                          |
| Independent reflections                     | 7521 [ $R_{\text{int}}$ = 0.0478, $R_{\text{sigma}}$ = 0.0387] |
| Data/restraints/parameters                  | 7521/317/536                                                   |
| Goodness-of-fit on F <sup>2</sup>           | 1.273                                                          |
| Final R indexes [ $I \geq 2\sigma(I)$ ]     | $R_1$ = 0.0592, $wR_2$ = 0.1713                                |
| Final R indexes [all data]                  | $R_1$ = 0.0678, $wR_2$ = 0.1778                                |
| Largest diff. peak/hole / e Å <sup>-3</sup> | 1.63/-1.52                                                     |

### 4.3 Crystal data and X-ray structure of cluster 2 :

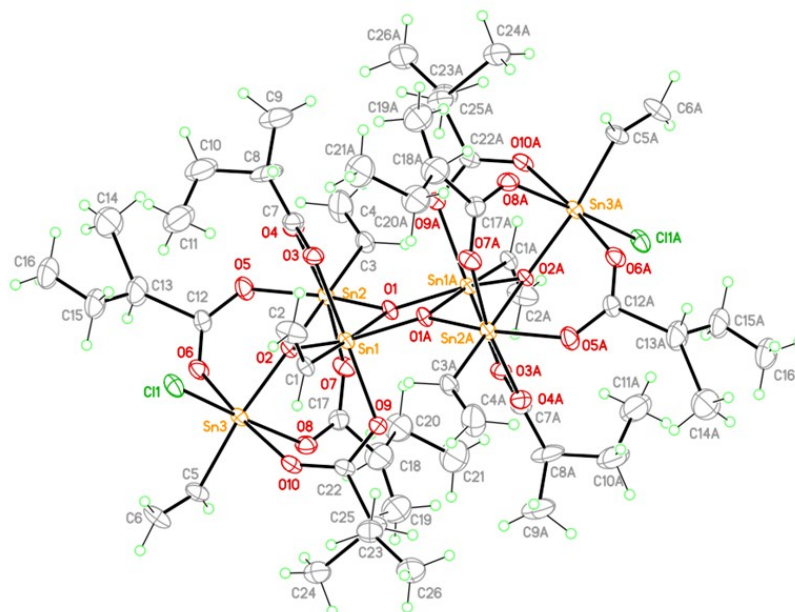

Table 1. Crystal data and structure refinement for 210753lt\_0m\_a.

|                                 |                                                                                 |                 |
|---------------------------------|---------------------------------------------------------------------------------|-----------------|
| Identification code             | 210753lt_0m_a                                                                   |                 |
| Empirical formula               | C <sub>52</sub> H <sub>90</sub> Cl <sub>2</sub> O <sub>20</sub> Sn <sub>6</sub> |                 |
| Formula weight                  | 1818.27                                                                         |                 |
| Temperature                     | 100(2) K                                                                        |                 |
| Wavelength                      | 0.71073 Å                                                                       |                 |
| Crystal system                  | Triclinic                                                                       |                 |
| Space group                     | P-1                                                                             |                 |
| Unit cell dimensions            | a = 10.7499(9) Å                                                                | α = 67.810(4)°. |
|                                 | b = 13.2738(11) Å                                                               | β = 71.148(4)°. |
|                                 | c = 14.0693(11) Å                                                               | γ = 73.030(4)°. |
| Volume                          | 1725.8(3) Å <sup>3</sup>                                                        |                 |
| Z                               | 1                                                                               |                 |
| Density (calculated)            | 1.750 Mg/m <sup>3</sup>                                                         |                 |
| Absorption coefficient          | 2.278 mm <sup>-1</sup>                                                          |                 |
| F(000)                          | 896                                                                             |                 |
| Crystal size                    | 0.23 x 0.20 x 0.06 mm <sup>3</sup>                                              |                 |
| Theta range for data collection | 1.610 to 26.514°.                                                               |                 |
| Index ranges                    | -13 ≤ h ≤ 12, -16 ≤ k ≤ 16, -17 ≤ l ≤ 16                                        |                 |
| Reflections collected           | 28957                                                                           |                 |
| Independent reflections         | 7053 [R(int) = 0.0502]                                                          |                 |
| Completeness to theta = 25.242° | 99.6 %                                                                          |                 |

|                                   |                                             |
|-----------------------------------|---------------------------------------------|
| Absorption correction             | Semi-empirical from equivalents             |
| Max. and min. transmission        | 0.7454 and 0.6419                           |
| Refinement method                 | Full-matrix least-squares on F <sup>2</sup> |
| Data / restraints / parameters    | 7053 / 414 / 525                            |
| Goodness-of-fit on F <sup>2</sup> | 1.080                                       |
| Final R indices [I > 2σ(I)]       | R1 = 0.0406, wR2 = 0.1111                   |
| R indices (all data)              | R1 = 0.0539, wR2 = 0.1288                   |
| Extinction coefficient            | n/a                                         |
| Largest diff. peak and hole       | 1.401 and -1.066 e.Å <sup>-3</sup>          |



## 5. Spectral data of key compounds

### 5.1 Spectral data for cluster 1 :

Transparent crystal (59%) ;  $^1\text{H}$  NMR (400 MHz,  $\text{CDCl}_3$ ) :  $\delta$  5.92-5.88 (m, 8H), 5.12-5.07 (m, 16H), 3.12-3.04 (m, 8H), 1.73-1.62 (m, 24H), 1.34-1.32 (m, 12H), 1.24-1.18 (m, 24H), 0.88 (d,  $J = 7.1$  Hz, 18H);  $^{13}\text{C}$  NMR (125 MHz,  $\text{CDCl}_3$ ) :  $\delta$  182.7, 181.8, 138.7, 137.9, 137.7, 115.8, 115.4, 115.1, 114.9, 114.5, 114.4, 46.5, 46.5, 46.3, 46.2, 35.6, 35.5, 27.7, 27.5, 27.2, 27.1, 26.7, 26.4, 26.2, 26.1, 25.7, 17.2, 17.0;  $^{119}\text{Sn}$  NMR (186 MHz,  $\text{CDCl}_3$ ) :  $\delta$  -483.9, -522.3, -523.6, -551.1; HRMS (ESI+, m/z) Calcd. For  $^{12}\text{C}_{64}^{1}\text{H}_{110}^{35}\text{Cl}_2^{16}\text{O}_{20}^{120}\text{Sn}_6$   $[\text{M}+\text{H}]^+$  : 1989.11, found : 1989.87; EA Anal. Calcd. for  $\text{C}_{64}\text{H}_{110}\text{Cl}_2\text{O}_{20}\text{Sn}_6$  : C : 38.77% ; H : 5.59%, found : C : 38.65% ; H : 5.58%.

### 5.2 Spectral data for cluster 2 :

Transparent crystal (65%);  $^1\text{H}$  NMR (500 MHz,  $\text{CDCl}_3$ ) :  $\delta$  6.22-5.91 (m, 18H) , 2.44-2.24 (m, 8H) , 1.72-1.35 (m, 16H) , 1.17-1.07 (m, 24H) , 0.93-0.85 (m, 24H) ;  $^{13}\text{C}$  NMR (125 MHz,  $\text{CDCl}_3$ ) :  $\delta$  186.0, 185.4, 185.2, 185.1, 184.6, 184.1, 183.5, 145.2, 141.9, 141.1, 140.8, 139.7, 139.3, 138.7, 138.3, 138.1, 136.3, 135.5, 135.1, 134.5, 133.9, 133.5, 133.0, 132.1, 131.8, 131.2, 123.0, 43.9, 43.8, 43.8, 43.6, 40.5, 27.3, 27.2, 27.1, 26.8, 16.9, 16.8, 16.7, 16.5, 11.7, 11.5;  $^{119}\text{Sn}$  NMR (186 MHz,  $\text{CDCl}_3$ ) :  $\delta$  -183.96, -539.25, -542.63, -547.88. HRMS (ESI+, m/z) Calcd. For  $\text{C}_{52}\text{H}_{90}\text{Cl}_2\text{O}_{20}\text{Sn}_6$   $[\text{M}+\text{H}]^+$  : 1823.95, found: 1824.75; EA Anal. Calcd. for  $\text{C}_{52}\text{H}_{90}\text{Cl}_2\text{O}_{20}\text{Sn}_6$  : C: 34.35%; H: 4.99%, found: C: 34.32%; H: 4.94%.

## 6. $^1\text{H}$ and $^{13}\text{C}$ NMR of key compounds

### 6.1 Spectral data for cluster 1

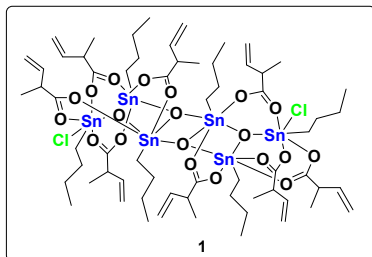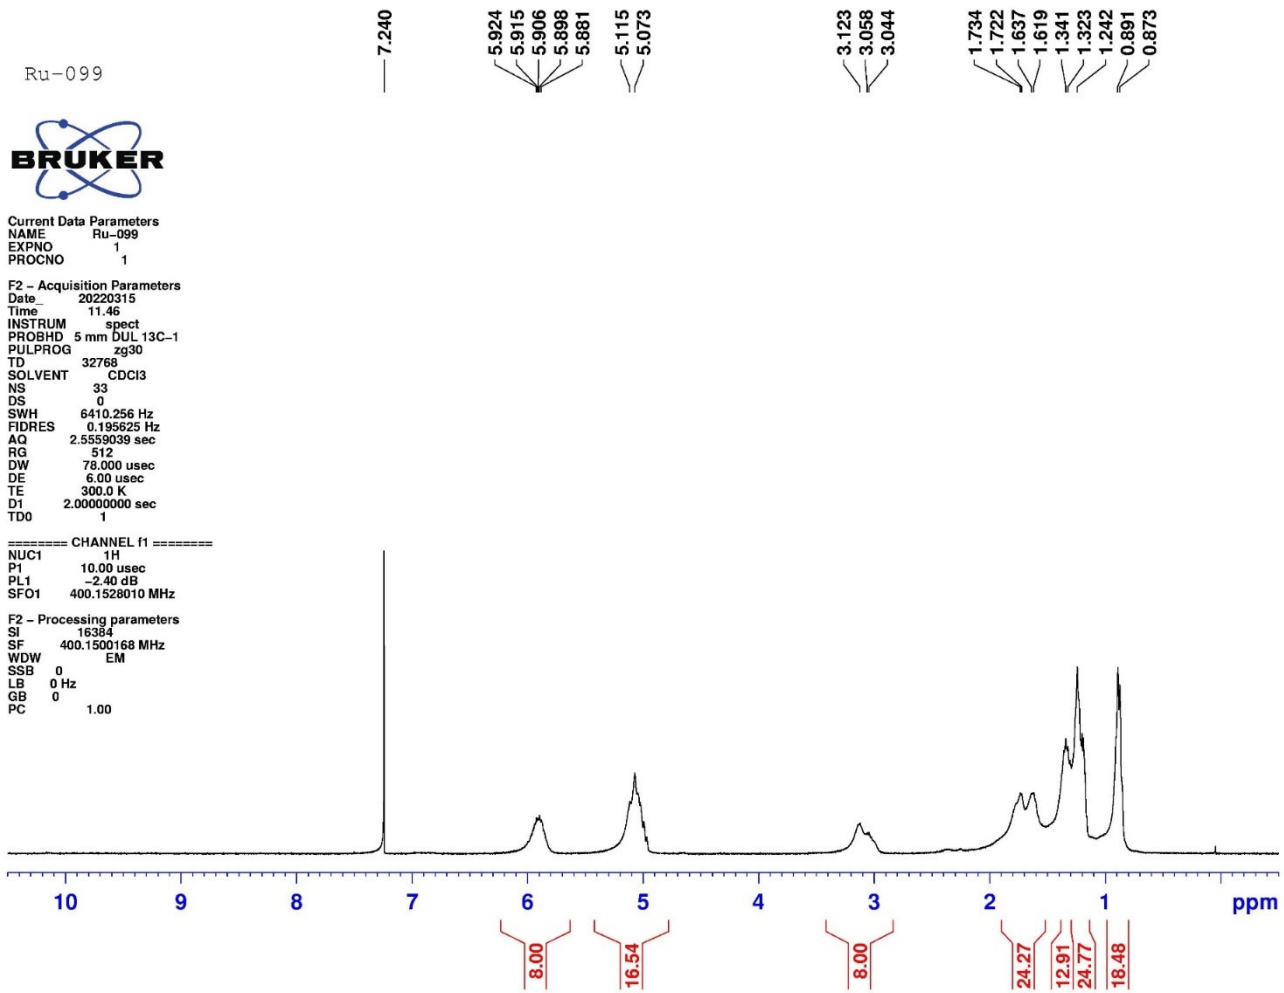

Ru099

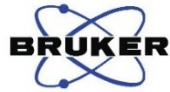

Current Data Parameters  
NAME liou220402.001  
EXPNO 2  
PROCNO 1

F2 - Acquisition Parameters

Time 7.06 h  
INSTRUM spect  
PROBHD Z119470\_0234 (  
PULPROG zgpg30  
TD 32768  
SOLVENT CDCl3  
NS 8000  
DS 0  
SWH 29761.904 Hz  
FIDRES 0.908261 Hz  
AQ 0.5505024 sec  
RG 191.01  
DW 16.800 usec  
DE 6.50 usec  
TE 300.2 K  
D1 2.00000000 sec  
D11 0.03000000 sec  
TD0 1  
SFO1 125.7785374 MHz  
NUC1 13C  
P1 10.00 usec  
PLW1 87.00000000 W  
SFO2 500.1620006 MHz  
NUC2 1H  
CPDPRG2 br\_waltz25\_256  
PCPD2 80.00 usec  
PLW2 29.50000000 W  
PLW12 0.46094000 W  
PLW13 0.23148000 W

F2 - Processing parameters  
SI 32768  
SF 125.7653339 MHz  
WDW EM  
SSB 0  
LB 3.00 Hz  
GB 0  
PC 1.00

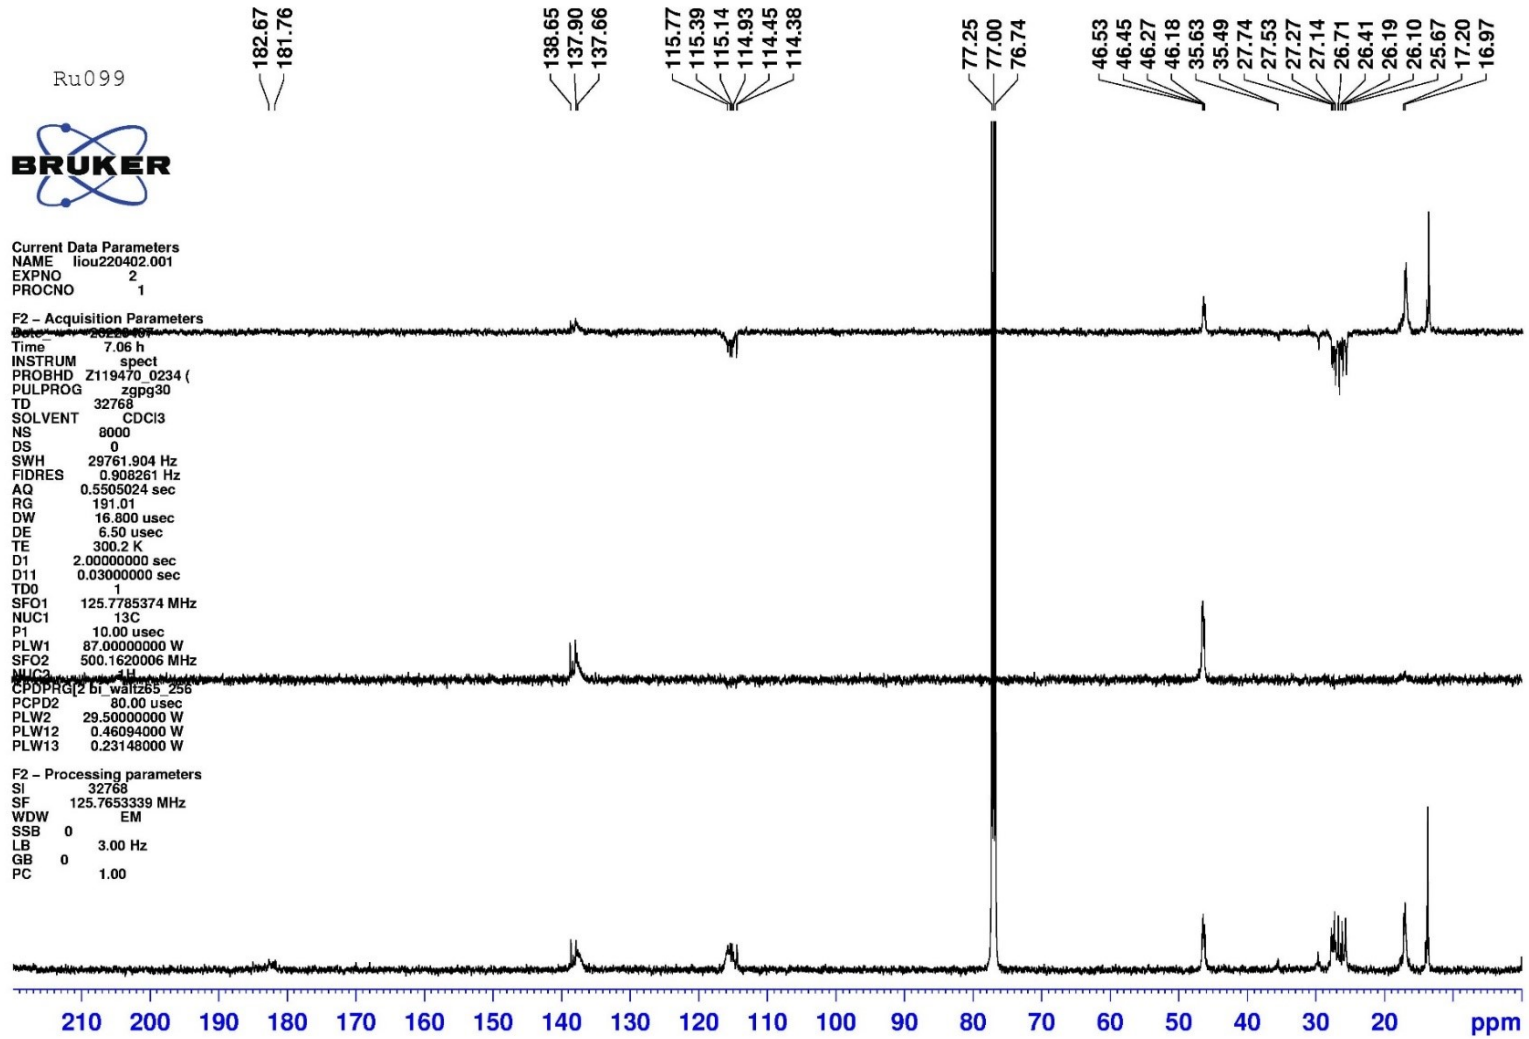



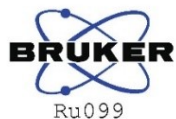

Current Data Parameters  
NAME liou220402.001  
EXPNO 5  
PROCNO 1

F2 - Acquisition Parameters  
Date\_ 20220408  
Time 2.48 h  
INSTRUM spect  
PROBHD Z119470\_0234 (   
PULPROG zgpg  
TD 65536  
SOLVENT CDCl3  
NS 4096  
DS 0  
SWH 750000.000 Hz  
FIDRES 11.444092 Hz  
AQ 0.0436907 sec  
RG 191.01  
DW 0.667 usec  
DE 6.50 usec  
TE 300.1 K  
D1 2.00000000 sec  
D11 0.03000000 sec  
TD0 1  
SFO1 186.5128250 MHz  
NUC1 119Sn  
P1 15.00 usec  
PLW1 50.00000000 W  
SFO2 500.1620006 MHz  
NUC2 1H  
CPDPRG2 waltz16  
PCPD2 80.00 usec  
PLW2 29.50000000 W  
PLW12 0.46094000 W  
PLW13 0.23148000 W

F2 - Processing parameters  
SI 32768  
SF 186.5128038 MHz  
WDW EM  
SSB 0

-483.937  
-522.263  
-523.632  
-551.054

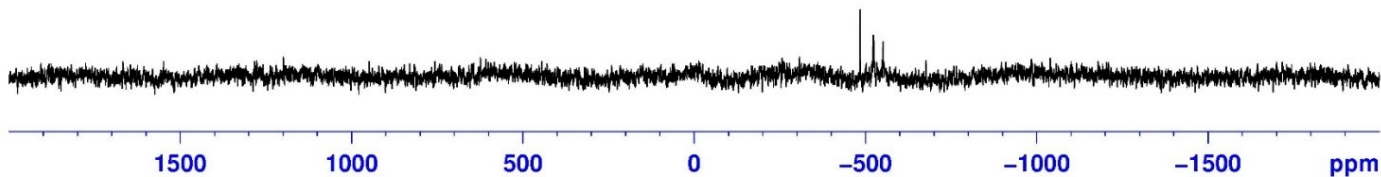

## 6.2 Spectral data for cluster 2

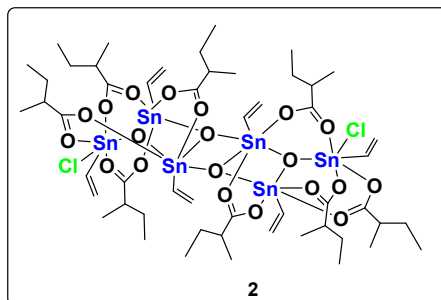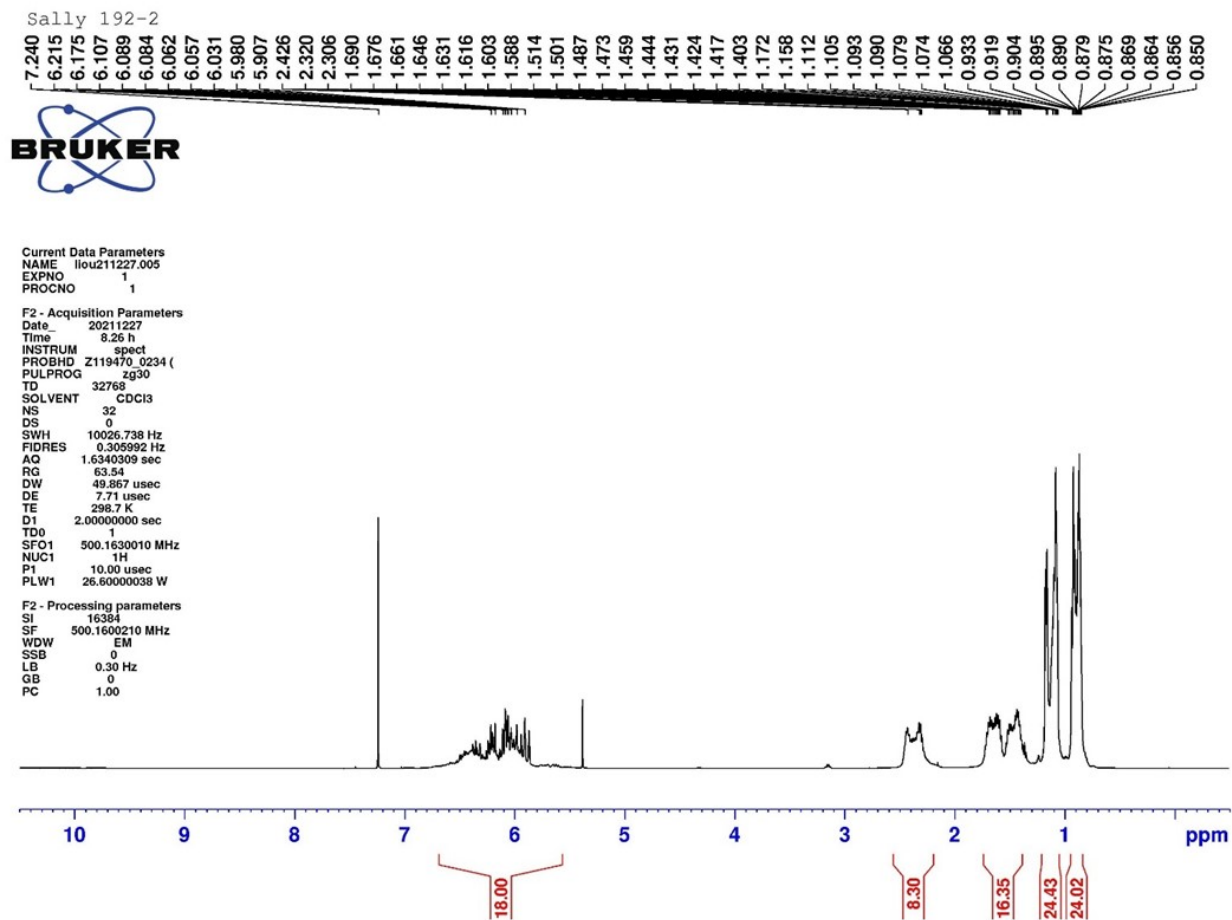

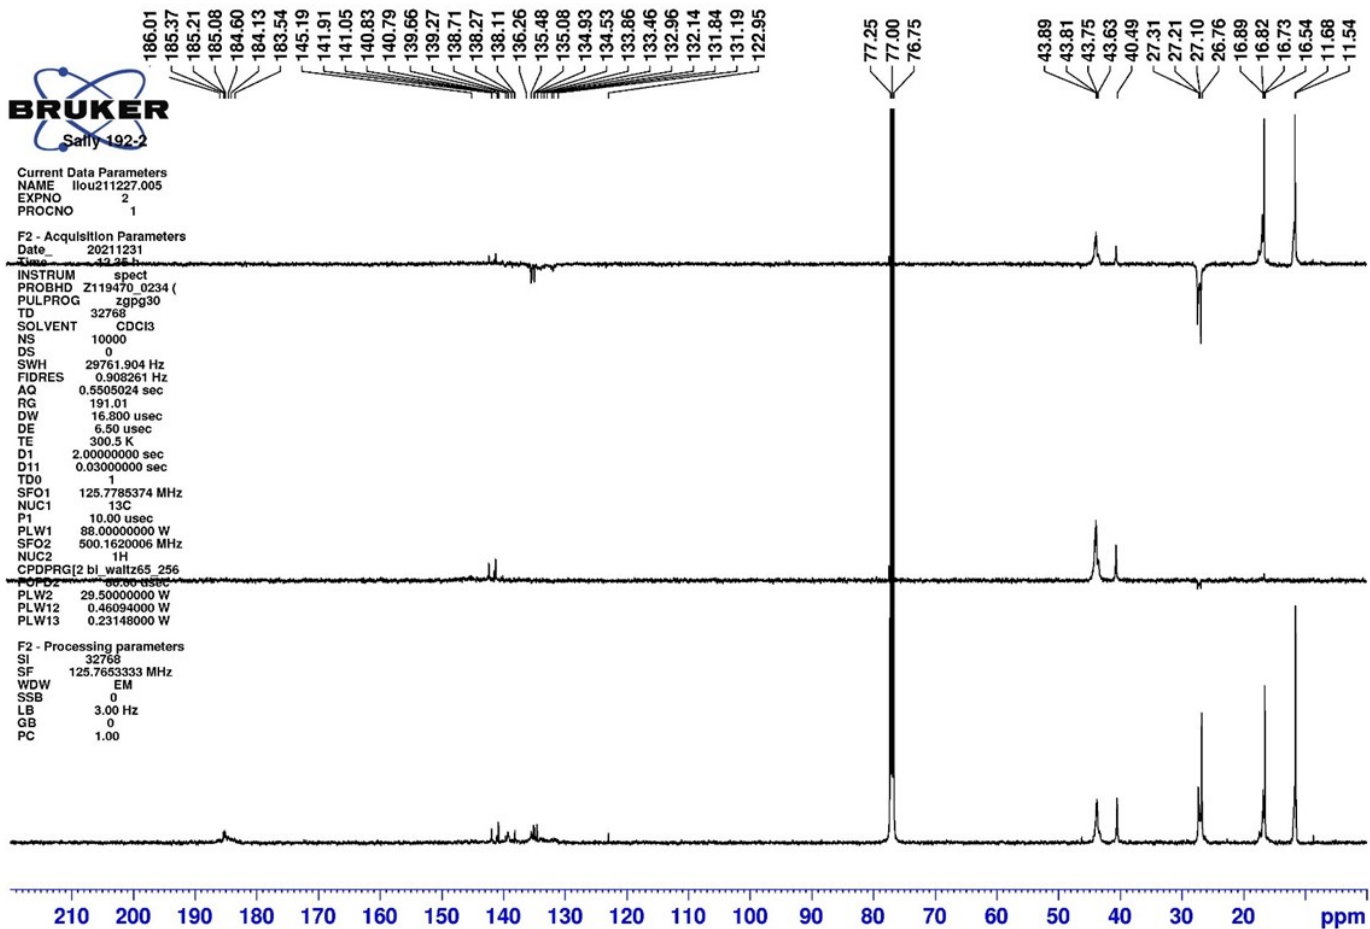

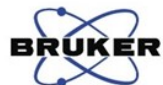

Current Data Parameters  
NAME ilou211227.005  
EXPNO 5  
PROCNO 1

F2 - Acquisition Parameters  
Date\_ 20211231  
Time 19.28 h  
INSTRUM spect  
PROBHD Z119470\_0234 (  
PULPROG zgpg  
TD 65536  
SOLVENT CDCl3  
NS 4096  
DS 0  
SWH 750000.000 Hz  
FIDRES 11.444092 Hz  
AQ 0.0436907 sec  
RG 191.01  
DW 0.667 usec  
DE 6.50 usec  
TE 300.3 K  
D1 2.0000000 sec  
D11 0.03000000 sec  
TD0 1  
SFO1 186.5128250 MHz  
NUC1 119Sn  
P1 15.00 usec  
PLW1 50.0000000 W  
SFO2 500.1620006 MHz  
NUC2 1H  
CPDPRG2 waltz16  
PCPD2 80.00 usec  
PLW2 29.5000000 W  
PLW12 0.46094000 W  
PLW13 0.23148000 W

F2 - Processing parameters  
SI 32768  
SF 186.5128038 MHz  
WDW EM  
SSB 0

-183.961

-539.246

-542.627

-547.881

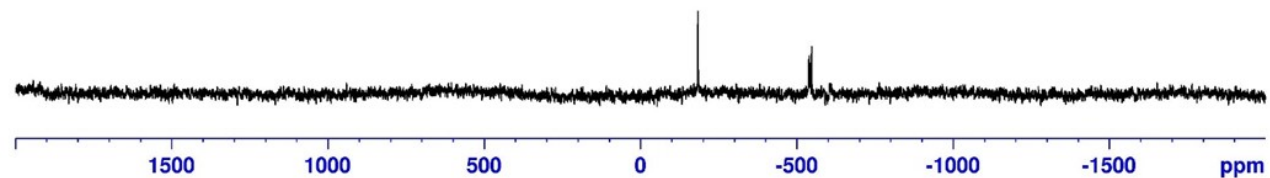

Supplement: d3na00131h1.pdf [file d3na00131h1.pdf]
